# Supplementary material for: Sugar-Induced Cell Death in the Yeast S. cerevisiae Is Accompanied by the Release of Octanoic Acid, Which Does Not Originate from the Fatty Acid Synthesis Type II Mitochondrial System
Source: MDPI journal article supplement (doi:10.3390/applmicrobiol3030050), 2023-07-12
Supplement: s1 [file s1]

## Area Percent Report

Data Path : D:\GS\_DATA\  
Data File : Sample 68.D  
Acq On : 21 Apr 2022 16:19  
Operator :  
Sample : Sample 68  
Misc : medium T  
ALS Vial : 3 Sample Multiplier: 1

Integration Parameters: events.e  
Integrator: ChemStation

Method : C:\GCMS\inch\methods\IC\_Default.m  
Title :

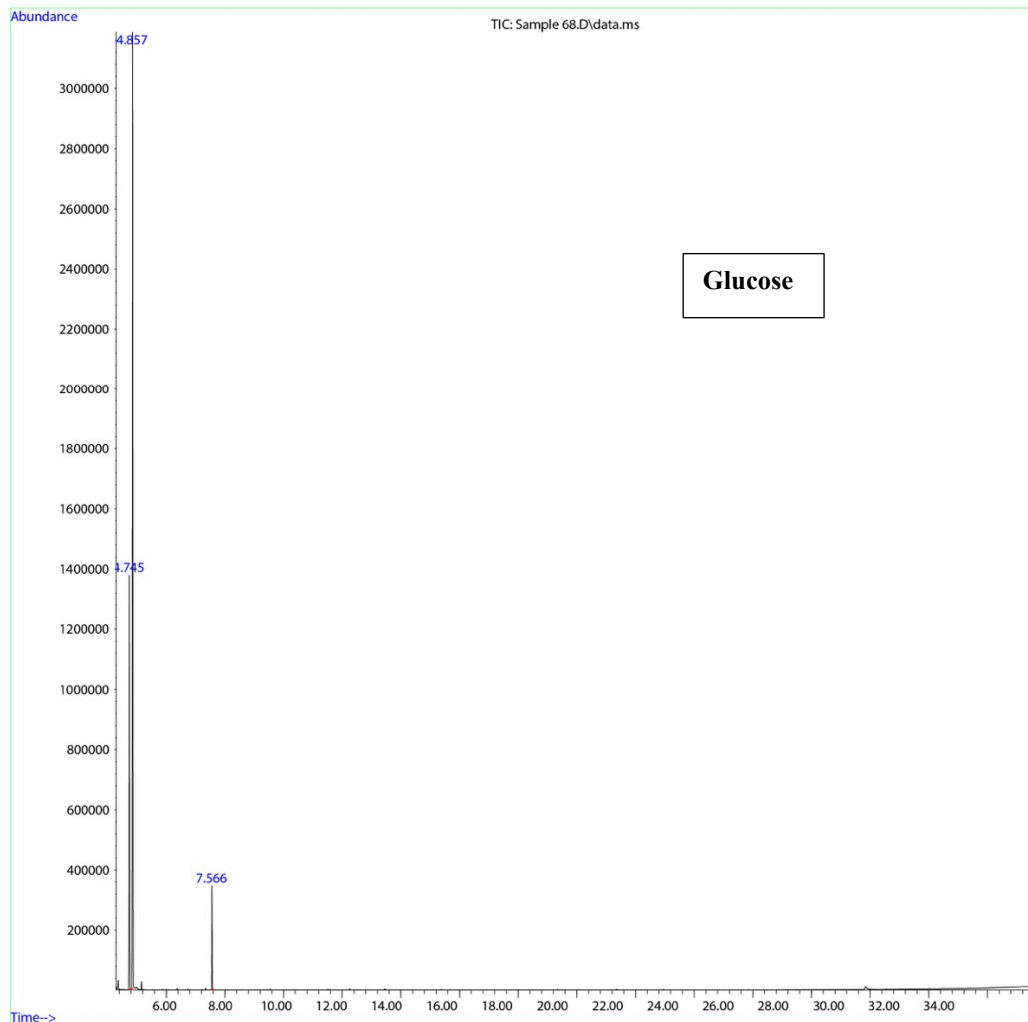

IC\_Default.m Thu Apr 21 17:19:01 2022

Page: 2

| Library Search Report                                               |       |       |                                                               |       |             |      |
|---------------------------------------------------------------------|-------|-------|---------------------------------------------------------------|-------|-------------|------|
| Data Path : D:\GS_DATA\ Data File : Sample 68.D                     |       |       |                                                               |       |             |      |
| Acq On : 21 Apr 2022 16:19                                          |       |       |                                                               |       |             |      |
| Operator :                                                          |       |       |                                                               |       |             |      |
| Sample : Sample 68 Misc : medium T                                  |       |       |                                                               |       |             |      |
| ALS Vial : 3 Sample Multiplier: 1                                   |       |       |                                                               |       |             |      |
| Search Libraries: D:\MassHunter\Library\NIST17.L Minimum Quality: 0 |       |       |                                                               |       |             |      |
| Unknown Spectrum: Apex                                              |       |       |                                                               |       |             |      |
| Integration Events: ChemStation Integrator - events.e               |       |       |                                                               |       |             |      |
| Pk#                                                                 | RT    | Area% | Library/ID                                                    | Ref#  | CAS#        | Qual |
| 1                                                                   | 4,745 | 24.84 | D:\MassHunter\Library\NIST17.L<br>Ethylbenzene                | 5644  | 000100-41-4 | 91   |
|                                                                     |       |       | Ethylbenzene                                                  | 5646  | 000100-41-4 | 90   |
|                                                                     |       |       | Ethylbenzene                                                  | 5645  | 000100-41-4 | 90   |
| 2                                                                   | 4,857 | 69.54 | D:\MassHunter\Library\NIST17.L<br>p-Xylene                    | 5629  | 000106-42-3 | 95   |
|                                                                     |       |       | Benzene, 1,3-dimethyl-                                        | 5661  | 000108-38-3 | 95   |
|                                                                     |       |       | o-Xylene                                                      | 5639  | 000095-47-6 | 95   |
| 3                                                                   | 7,566 | 5.63  | D:\MassHunter\Library\NIST17.L<br>Octanoic acid, methyl ester | 33934 | 000111-11-5 | 96   |
|                                                                     |       |       | Octanoic acid, methyl ester                                   | 33918 | 000111-11-5 | 90   |
|                                                                     |       |       | Octanoic acid, methyl ester                                   | 33931 | 000111-11-5 | 83   |

## Area Percent Report

Data Path : D:\GS\_DATA\  
Data File : Sample 182.D  
Acq On : 21 Jun 2023 15:42  
Operator :  
Sample : Sample 182  
Misc : pH  
ALS Vial : 5 Sample Multiplier: 1

Integration Parameters: autoint1.e  
Integrator: ChemStation

Method : C:\GCMS\inch\methods\IC\_Default.m  
Title :

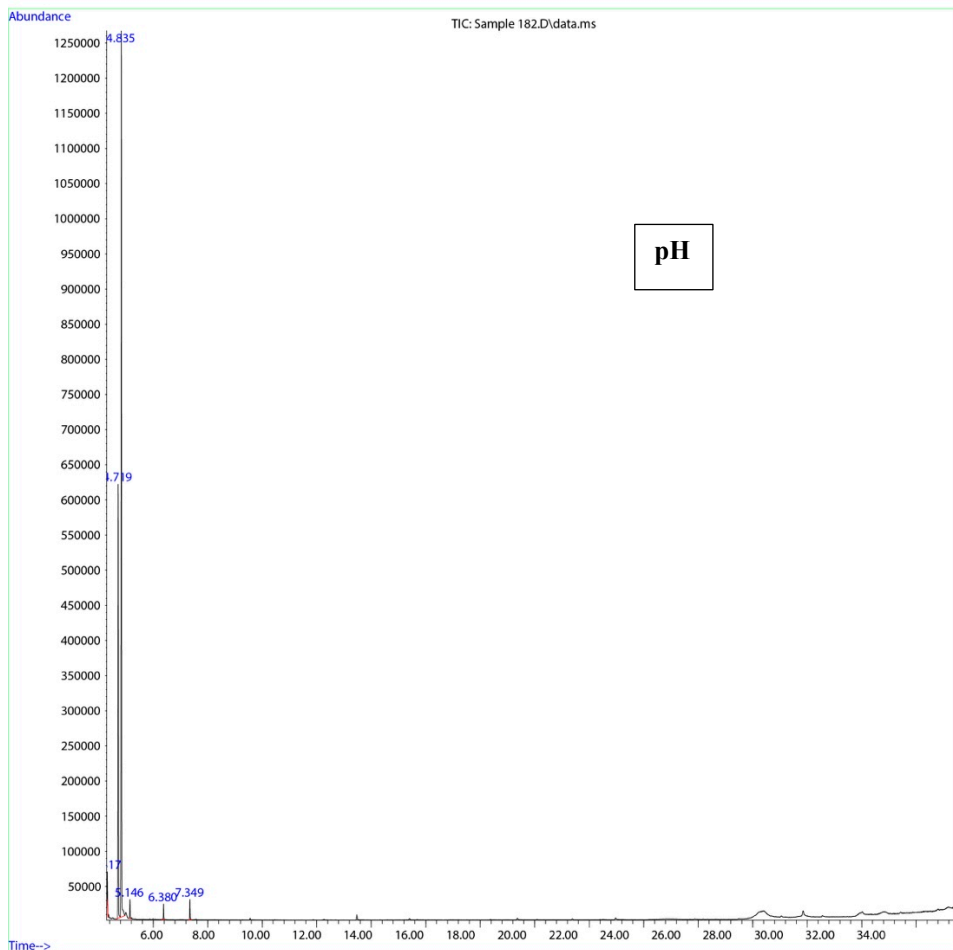

IC\_Default.m Wed Jun 21 16:32:25 2023

Page: 2

| Library Search Report                                               |       |       |                                      |      |                |
|---------------------------------------------------------------------|-------|-------|--------------------------------------|------|----------------|
| Data Path : D:\GS_DATA\ Data File : Sample 182.D                    |       |       |                                      |      |                |
| Acq On : 21 Jun 2023 15:42                                          |       |       |                                      |      |                |
| Operator :                                                          |       |       |                                      |      |                |
| Sample : Sample 182 Misc : pH                                       |       |       |                                      |      |                |
| ALS Vial : 5 Sample Multiplier: 1                                   |       |       |                                      |      |                |
| Search Libraries: D:\MassHunter\Library\NIST17.L Minimum Quality: 0 |       |       |                                      |      |                |
| Unknown Spectrum: Apex                                              |       |       |                                      |      |                |
| Integration Events: ChemStation Integrator - autoint1.e             |       |       |                                      |      |                |
| PK#                                                                 | RT    | Area% | Library/ID                           | Ref# | CAS# Qual      |
| 1                                                                   | 4,317 |       | 1.62 D:\MassHunter\Library\NIST17.L  | 7397 | 001678-91-7 91 |
|                                                                     |       |       | Cyclohexane, ethyl-                  | 7392 | 001678-91-7 91 |
|                                                                     |       |       | Cyclohexane, ethyl-                  | 7396 | 001678-91-7 87 |
| 2                                                                   | 4,719 |       | 29.01 D:\MassHunter\Library\NIST17.L | 5646 | 000100-41-4 91 |
|                                                                     |       |       | Ethylbenzene                         | 5643 | 000100-41-4 91 |
|                                                                     |       |       | Ethylbenzene                         | 5644 | 000100-41-4 91 |
| 3                                                                   | 4,835 |       | 66.23 D:\MassHunter\Library\NIST17.L | 5661 | 000108-38-3 95 |
|                                                                     |       |       | Benzene, 1,3-dimethyl-               | 5639 | 000095-47-6 95 |
|                                                                     |       |       | o-Xylene                             | 5638 | 000095-47-6 94 |
| 4                                                                   | 5,146 |       | 1.14 D:\MassHunter\Library\NIST17.L  | 5639 | 000095-47-6 94 |
|                                                                     |       |       | o-Xylene                             | 5629 | 000106-42-3 94 |
|                                                                     |       |       | p-Xylene                             |      |                |

|   |       |                                                 |       |             |    |
|---|-------|-------------------------------------------------|-------|-------------|----|
|   |       | Benzene, 1,3-dimethyl-                          | 5661  | 000108-38-3 | 94 |
| 5 | 6,380 | 0.86 D:\MassHunter\Library\NIST17.L<br>Decane   | 21357 | 000124-18-5 | 90 |
|   |       | Decane                                          | 21358 | 000124-18-5 | 74 |
|   |       | Decane                                          | 21360 | 000124-18-5 | 68 |
| 6 | 7,349 | 1.13 D:\MassHunter\Library\NIST17.L<br>Undecane | 31794 | 001120-21-4 | 95 |
|   |       | Undecane                                        | 31793 | 001120-21-4 | 90 |
|   |       | Undecane                                        | 31792 | 001120-21-4 | 83 |

Area Percent Report

Data Path : D:\GS\_DATA\  
Data File : Sample 183.D  
Acq On : 21 Jun 2023 16:22  
Operator :  
Sample : Sample 183  
Misc : KCl  
ALS Vial : 6 Sample Multiplier: 1

Integration Parameters: autoint1.e  
Integrator: ChemStation

Method : C:\GCMS\inch\methods\IC\_Default.m  
Title :

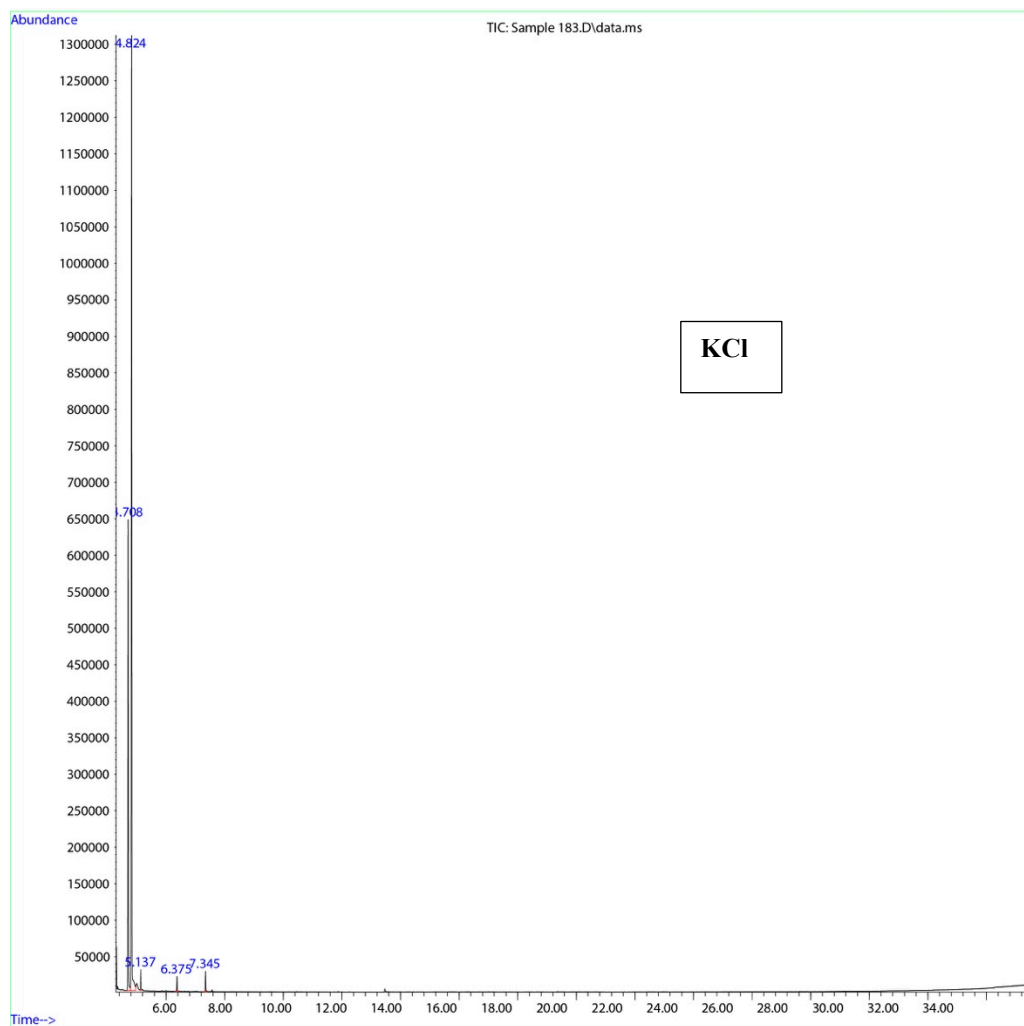

IC\_Default.m Wed Jun 21 17:37:56 2023

Page: 2

| Library Search Report                                               |       |       |                                                      |      |                |
|---------------------------------------------------------------------|-------|-------|------------------------------------------------------|------|----------------|
| Data Path : D:\GS_DATA\ Data File : Sample 183.D                    |       |       |                                                      |      |                |
| Acq On : 21 Jun 2023 16:22                                          |       |       |                                                      |      |                |
| Operator :                                                          |       |       |                                                      |      |                |
| Sample : Sample 183 Misc : KCl                                      |       |       |                                                      |      |                |
| ALS Vial : 6 Sample Multiplier: 1                                   |       |       |                                                      |      |                |
| Search Libraries: D:\MassHunter\Library\NIST17.L Minimum Quality: 0 |       |       |                                                      |      |                |
| Unknown Spectrum: Apex                                              |       |       |                                                      |      |                |
| Integration Events: ChemStation Integrator - autoint1.e             |       |       |                                                      |      |                |
| PK#                                                                 | RT    | Area% | Library/ID                                           | Ref# | CAS# Qual      |
| 1                                                                   | 4,708 |       | 29.54 D:\MassHunter\Library\NIST17.L<br>Ethylbenzene | 5646 | 000100-41-4 91 |
|                                                                     |       |       | Ethylbenzene                                         | 5643 | 000100-41-4 91 |

|   |       |                                                  |        |             |    |
|---|-------|--------------------------------------------------|--------|-------------|----|
|   |       | Ethylbenzene                                     | 5644   | 000100-41-4 | 91 |
| 2 | 4,824 | 67.58 D:\MassHunter\Library\NIST17.L<br>o-Xylene | 5639   | 000095-47-6 | 95 |
|   |       | Benzene, 1,3-dimethyl-                           | 5661   | 000108-38-3 | 95 |
|   |       | Benzene, 1,3-dimethyl-                           | 5660   | 000108-38-3 | 94 |
| 3 | 5,137 | 1.19 D:\MassHunter\Library\NIST17.L<br>o-Xylene  | 5639   | 000095-47-6 | 94 |
|   |       | o-Xylene                                         | 5630   | 000095-47-6 | 94 |
|   |       | p-Xylene                                         | 5629   | 000106-42-3 | 94 |
| 4 | 6,375 | 0.76 D:\MassHunter\Library\NIST17.L<br>Decane    | 21357  | 000124-18-5 | 80 |
|   |       | Decane                                           | 21358  | 000124-18-5 | 80 |
|   |       | Decane, 1,1'-oxybis-                             | 174935 | 002456-28-2 | 78 |
| 5 | 7,345 | 0.94 D:\MassHunter\Library\NIST17.L<br>Undecane  | 31793  | 001120-21-4 | 76 |
|   |       | Undecane                                         | 31794  | 001120-21-4 | 76 |
|   |       | Tetradecane, 1-chloro-                           | 104020 | 002425-54-9 | 74 |

**Figure S1.** Typical total ion chromatogram of the GC-MS analysis. **Glucose** – TIC of the media after 1 h incubation with 100 mM glucose in water. **pH** – TIC of the media after 1 h incubation with 100 mM glucose in 50 mM HEPES buffer pH 7.0. **KCl** – TIC of the media after 1 h incubation with 100 mM glucose + 150 mM KCl. OA has retention time 7.56.

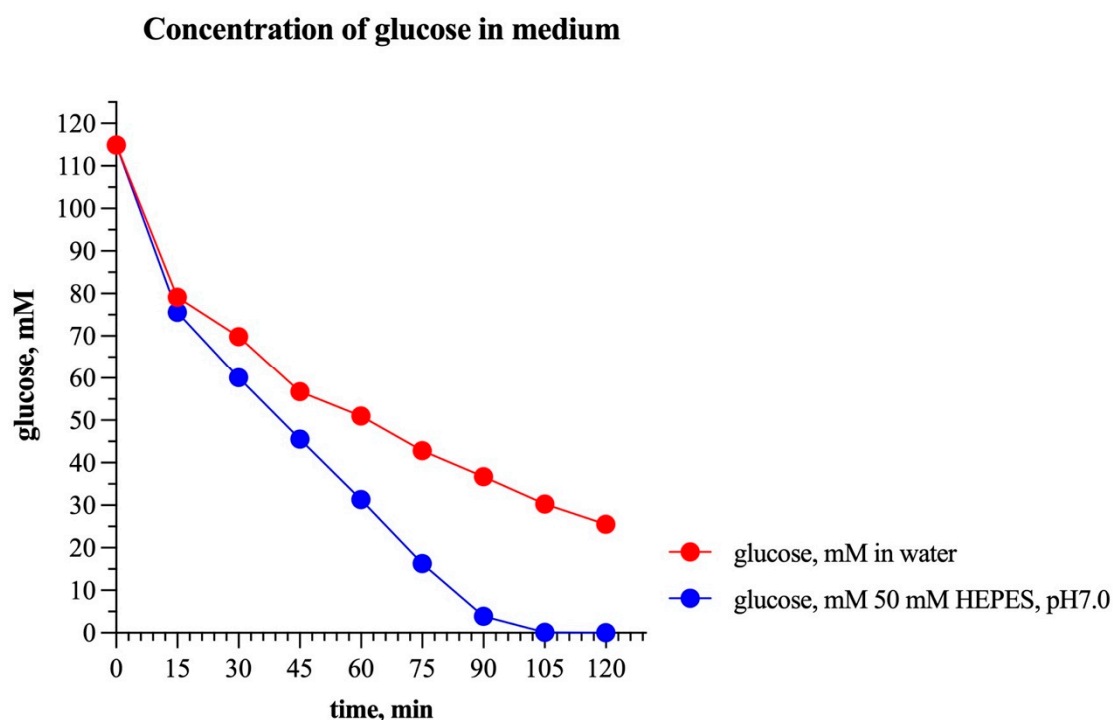

**Figure S2.** Dynamics of changes in glucose concentration in the incubation medium. BY4741 cells were incubated at 30°C with either 100 mM aqueous glucose solution or 100 mM glucose in 50 mM HEPES buffer pH 7.0. Glucose consumption in buffer was faster than in aqueous solution, which can be explained by the lack of proton control over ATPase.

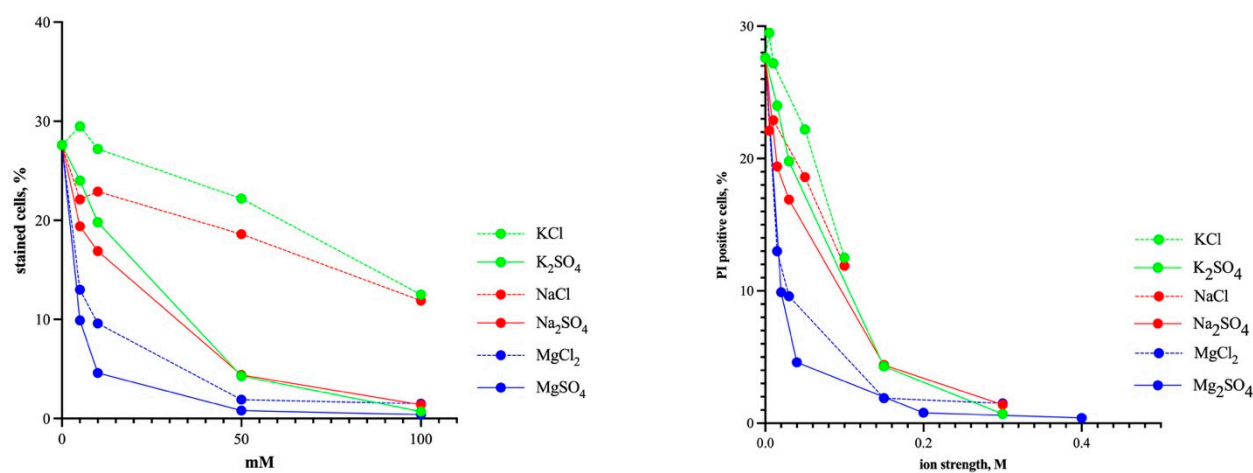

**Figure S3.** The effect of different concentrations of monovalent and divalent salts on the level of CICD. BY4741 cells were incubated for 1 hour at 30°C with 100 mM glucose in the presence of the indicated salt concentrations. Left panel - salts are given in equimolar concentrations in mM. Right panel - the same concentrations are displayed as the ionic strength of the solution in M.
